# Supplementary material for: Lactoferrin Induces the Synthesis of Vitamin B6 and Protects HUVEC Functions by Activating PDXP and the PI3K/AKT/ERK1/2 Pathway
Source: MDPI journal article supplement (doi:10.3390/ijms20030587), 2019-01-30
Supplement: s1 [file s1]

**Table S1. Screened genes**

| Group                 | R1             | R2         | R3          | R4         | R5          | R6         |
|-----------------------|----------------|------------|-------------|------------|-------------|------------|
| Description           | C vs H down    | C vs H up  | C vs L down | C vs L up  | L vs H down | L vs H up  |
| <b>Screened genes</b> | PTGES3L-AARSD1 | ARL6IP6    | MT-ATP6     | MBNL1      | AC084117.1  | AC121761.1 |
|                       | RPS21P1        | ZBTB14     | PARD6G-AS1  | DDX28      | HILPDA      | U62317.3   |
|                       | AL031710.2     | ZNF510     | AL390726.5  | AL035425.3 | ADM         | HLA-F-AS1  |
|                       |                | EID2       | AC008770.1  | SAP30      | SLC2A3      | LGALS1     |
|                       |                | ETAA1      | SH3BP1      | PKIA       | AC010655.4  | AL136982.4 |
|                       |                | ZNF24      | AP000346.2  | CFAP97     | PCBP2-OT1   | G0S2       |
|                       |                | OTUD6B-AS1 | GUCA1B      | ZNF292     | CITED2      | F11R       |
|                       |                | MAFB       | MYC         | KDELC2     | AC005363.1  | MTATP6P1   |
|                       |                | VIM-AS1    | ZNF710-AS1  | HOXA5      | PLIN2       | AC069499.1 |
|                       |                | TRIQK      | AC234775.3  | TIPARP     | SPRY1       | AL391244.3 |
|                       |                | PBX1       | AC021097.1  | FLJ37453   | NAMPTP1     | MTND2P28   |
|                       |                | AF106564.1 | AC011445.1  | RLF        | CXorf40A    | MT-ATP8    |
|                       |                | PRMT6      | AC136475.2  | C11orf96   | LOX         | MT-ND3     |
|                       |                | SFT2D3     | RPS10-NUDT3 | ARRDC3     | PEX2        | AC232271.1 |
|                       |                | TIGD5      | RPS18P9     | OMA1       | KDM3A       | DHRS2      |
|                       |                | C7orf25    | MORF4L2-AS1 | AC083843.2 | AC008115.3  | AL355987.3 |
|                       |                | PDXP       | TAOK2       | FOXC1      | SMG1P1      | KCNK9      |
|                       |                |            | RBM14       | AC006064.4 | "TSPAN14"   | AL110118.2 |
|                       |                |            | LINC01311   | ZIC5       | VEGFA       |            |
|                       |                |            | KIAA0391    | ARFIP1     | DDIT3       |            |
|                       |                |            |             | FOXD1      | GOLGA6L10   |            |
|                       |                |            |             | HOXA11     | LDHAP4      |            |
|                       |                |            |             | DLX2       | AC073046.1  |            |
|                       |                |            |             | RNF128     | SNHG25      |            |
|                       |                |            |             | ZNF518B    | P4HA1       |            |
|                       |                |            |             | AC009948.1 | CSRNP1      |            |
|                       |                |            |             | KC877982.1 | ATF3        |            |
|                       |                |            |             | NT5DC1     | SMG1P3      |            |
|                       |                |            |             | ID2        | GINS4       |            |
|                       |                |            |             | INSM1      | NHSL1       |            |
|                       |                |            |             | AL035425.2 | SLC7A5P2    |            |
|                       |                |            |             | FIBIN      | FGF9        |            |
|                       |                |            |             | KRCC1      | GADD45G     |            |
|                       |                |            |             | AP000295.1 |             |            |
|                       |                |            |             | AC004080.3 |             |            |
|                       |                |            |             | AC004080.5 |             |            |
|                       |                |            |             | DDIT4-AS1  |             |            |
|                       |                |            |             | PDXP       |             |            |
